# Supplementary material for: Catechol oxidation promoted by bridging phenoxo moieties in a bis(μ-phenoxo)-bridged dicopper(ii) complex
Source: Royal Society of Chemistry journal article supplement (doi:10.1039/d1ra02787e), 2021-01-01
Supplement: d1ra02787e1.pdf [file d1ra02787e1.pdf]

## Supplementary Information

### **Catechol oxidation promoted by bridging phenoxo moieties in a bis( $\mu$ -phenoxo)-bridged dicopper(II) complex**

Debojyoti Mukherjee,<sup>a</sup> Probal Nag,<sup>b</sup> Albert A Shteinman,<sup>c</sup> Sivaranjana Reddy Vennapusa,<sup>b</sup> Ujjwal Mandal,<sup>a,\*</sup> and Mainak Mitra<sup>d,\*</sup>

<sup>a</sup>*Department of Chemistry, University of Burdwan, Golapbug Campus, Purba Bardhaman-713104, India*

<sup>b</sup>*School of Chemistry, Indian Institute of Science Education and Research Thiruvananthapuram (IISER TVM), Maruthamala P.O., Vithura, Thiruvananthapuram-695551, Kerala, India*

<sup>c</sup>*Institute of Problems of Chemical Physics, 142432, Chernogolovka, Moscow district, Russian Federation*

<sup>d</sup>*Department of Chemistry, Burdwan Raj College, Aftab Avenue, Purba Bardhaman-713104, India*

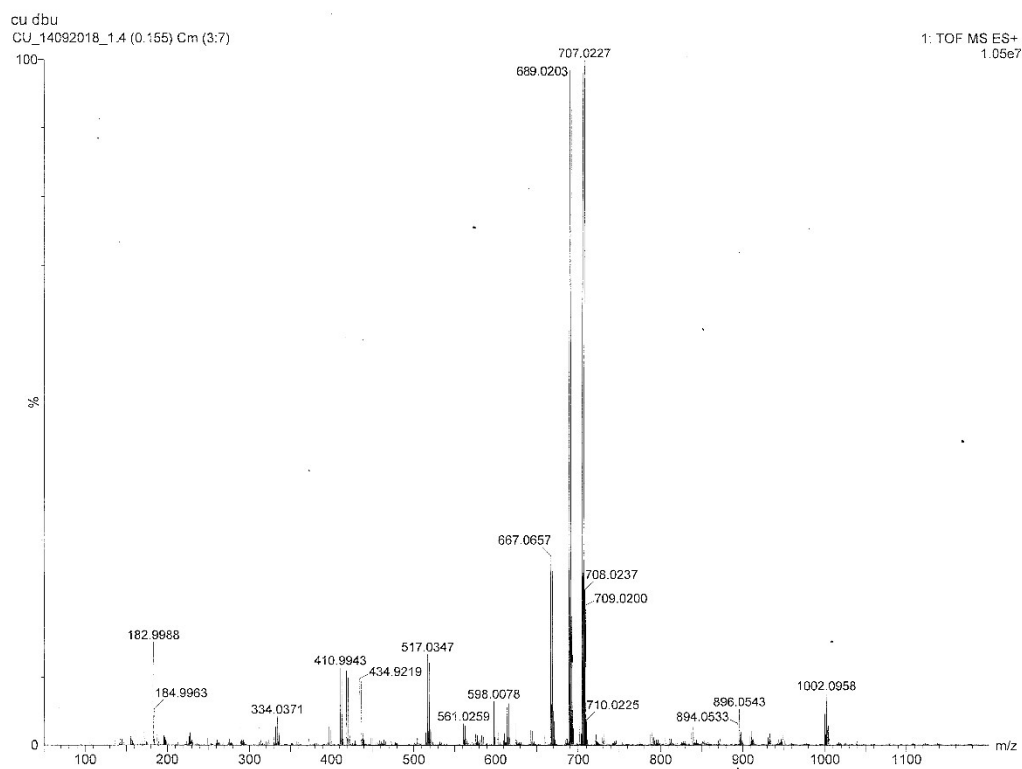

Figure S1. The ESI-MS of complex **1** in CH<sub>3</sub>OH.

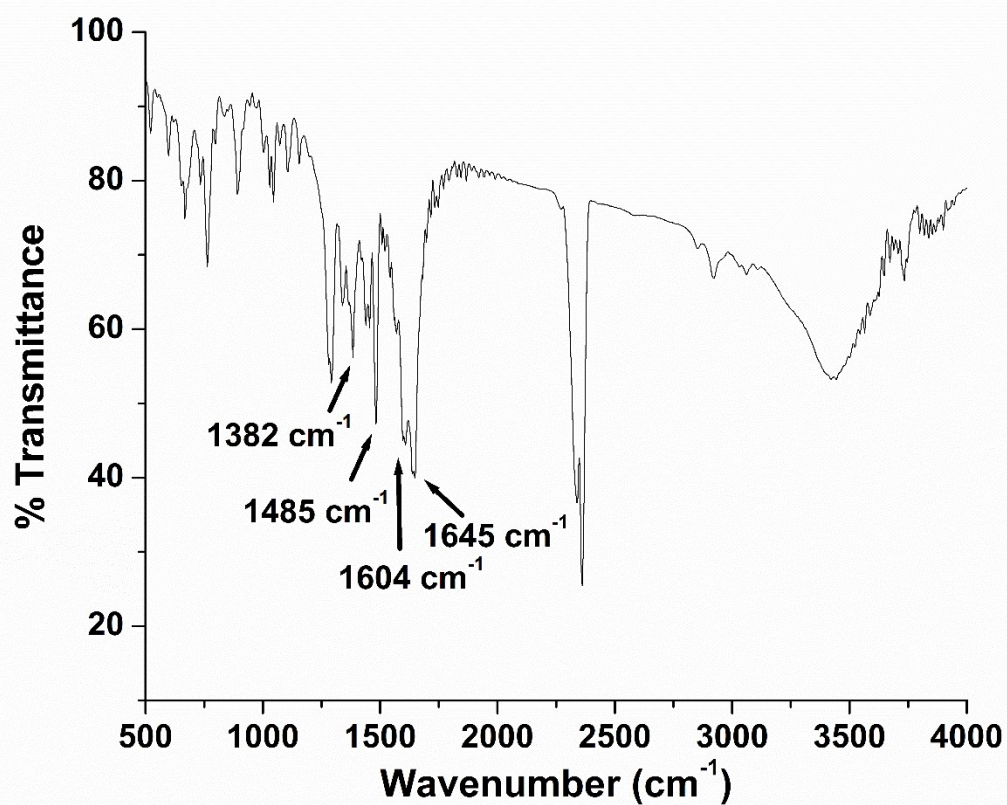

Figure S2. The FTIR spectrum of complex 1.

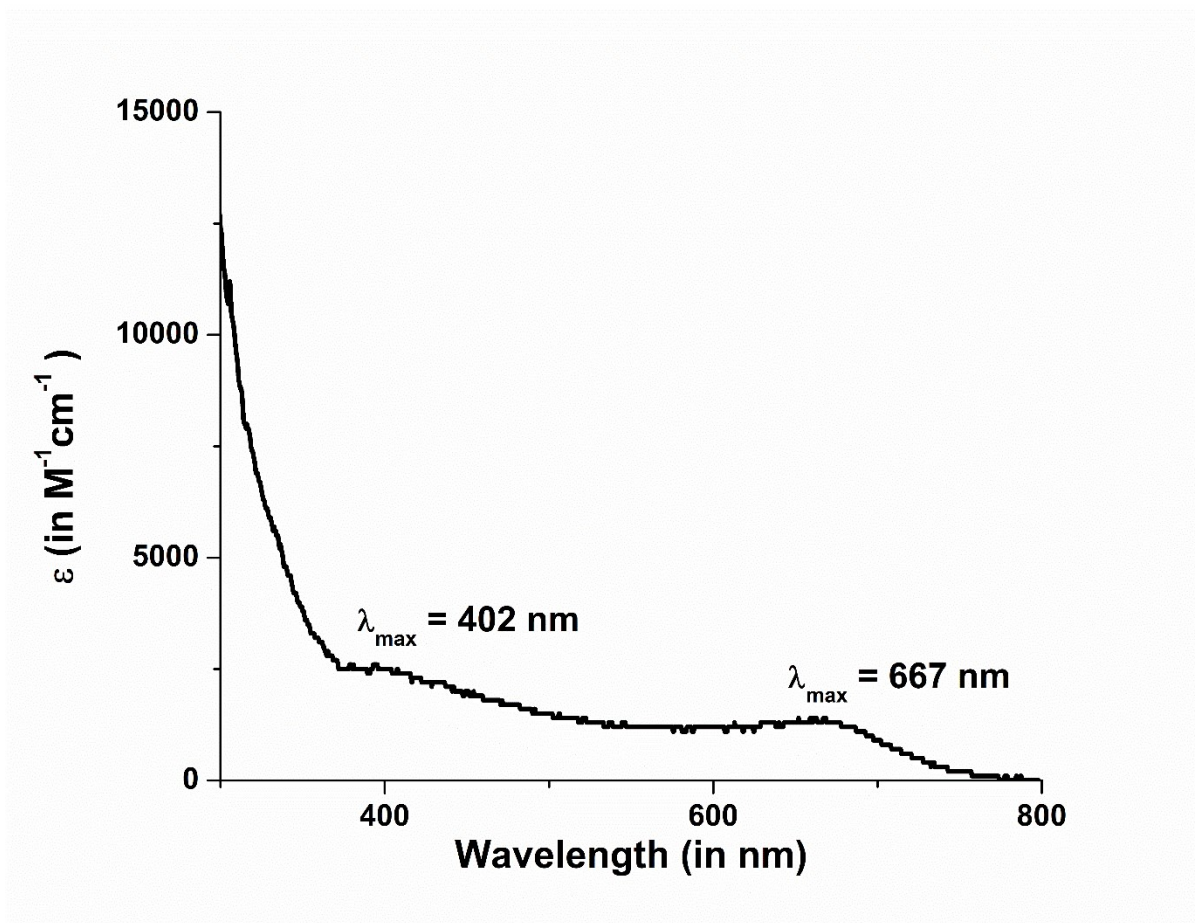

Figure S3. The UV/Vis spectrum of complex 1 in CH<sub>3</sub>OH recorded at 298 K.

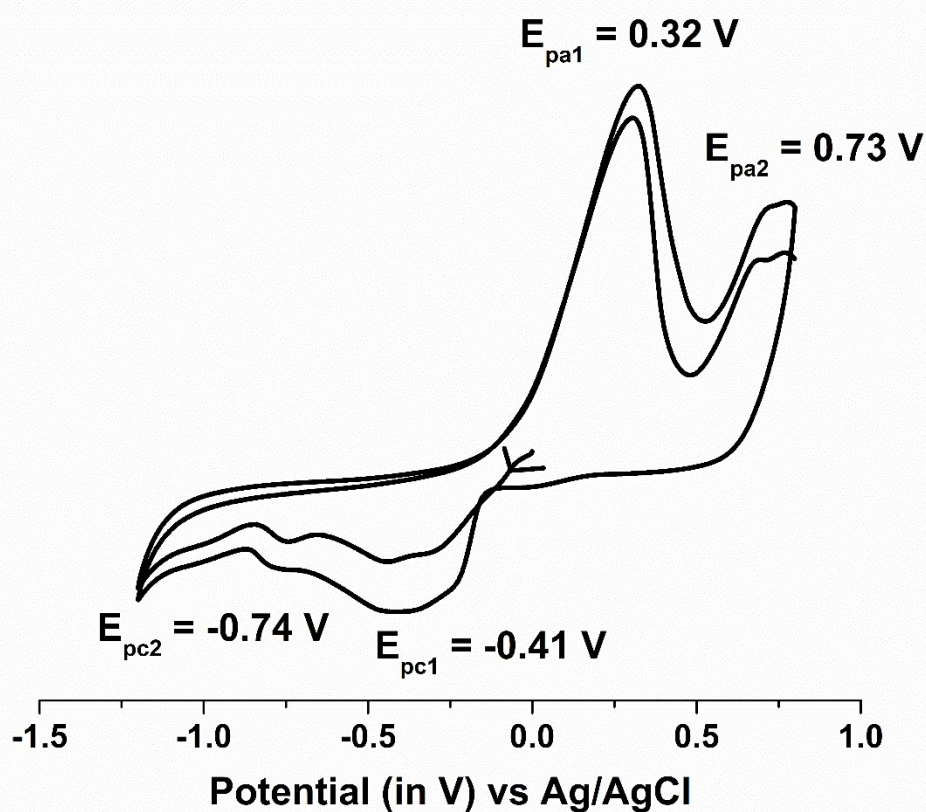

Figure S4. The cyclic voltammogram of complex 1 in CH<sub>3</sub>OH solution (298 K) using Pt-working electrode and Ag/AgCl reference electrode.

Table S1. Table for rate dependence on different substrate concentrations:

| Substrate concentration (M) | Rate of catecholase activity (in M s <sup>-1</sup> ) | Standard deviation (in M s <sup>-1</sup> ) |
|-----------------------------|------------------------------------------------------|--------------------------------------------|
| 1 x 10 <sup>-3</sup>        | 1.57 x 10 <sup>-7</sup>                              | 0.08 x 10 <sup>-7</sup>                    |
| 5 x 10 <sup>-3</sup>        | 3.44 x 10 <sup>-7</sup>                              | 0.17 x 10 <sup>-7</sup>                    |
| 7 x 10 <sup>-3</sup>        | 3.96 x 10 <sup>-7</sup>                              | 0.2 x 10 <sup>-7</sup>                     |
| 10 x 10 <sup>-3</sup>       | 5.02 x 10 <sup>-7</sup>                              | 0.25 x 10 <sup>-7</sup>                    |
| 3 x 10 <sup>-3</sup>        | 7.5 x 10 <sup>-7</sup>                               | 0.37 x 10 <sup>-7</sup>                    |
| 50 x 10 <sup>-3</sup>       | 7.6 x 10 <sup>-7</sup>                               | 0.38 x 10 <sup>-7</sup>                    |

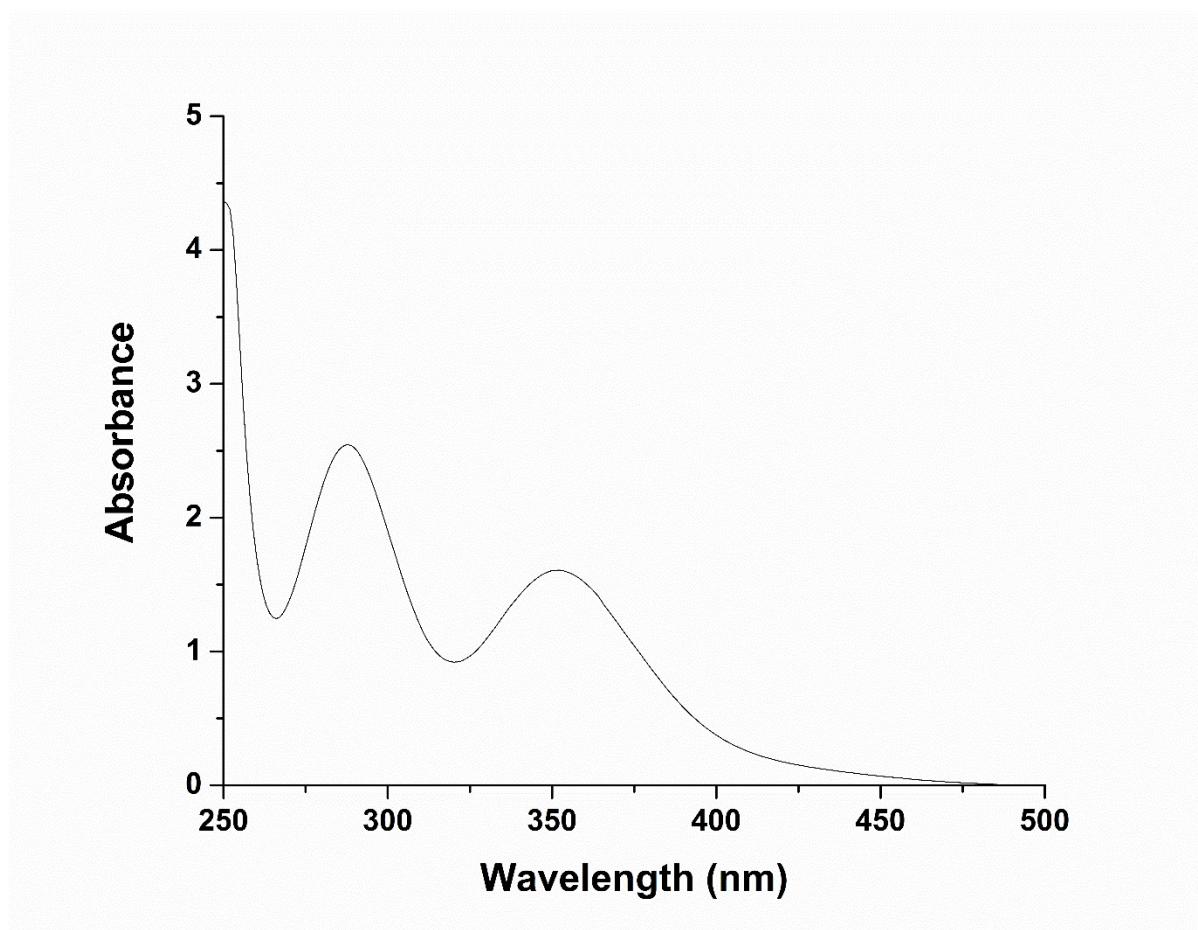

Figure S5. The formation of I<sub>3</sub><sup>-</sup> as detected by the characteristic absorbance band at  $\lambda_{\text{max}} = 353 \text{ nm}$  (298 K).

**DFT calculations:**



Absolute Gibbs Free Energies of all complexes at each step in the reaction pathway (Energies in Hartrees)

| Phenoxide Acceptor Pathway                   |              | Solvent (MeOH) Acceptor Pathway                                 |              |
|----------------------------------------------|--------------|-----------------------------------------------------------------|--------------|
| <b>Cu(II) – Cu(II) + Substrate (I)</b>       | -3150.57192  | <b>Cu(II) – Cu(II) + Substrate (I)</b>                          | -3150.57192  |
| <b>Cu-Substrate + 2*MeOH (II)</b>            | -3150.568219 | <b>Cu-Substrate + 2*MeOH (II)</b>                               | -3150.568219 |
| <b>Cu-Product + 2*MeOH (III)</b>             | -3150.599671 | <b>Cu-Product + 2*MeOH<sub>2</sub><sup>+</sup> (III)</b>        | -3150.030913 |
| <b>Cu(I) – Cu(I) + Product + 2*MeOH (IV)</b> | -3150.610358 | <b>Cu(I) – Cu(I) + Product + 2*MeOH<sub>2</sub><sup>+</sup></b> | -3150.043334 |

### Coordinates of Substrate (Catechol)

38

-696.897808 Hartrees

|   |             |             |             |
|---|-------------|-------------|-------------|
| C | 1.05823900  | -0.19962600 | 0.00000800  |
| C | -0.25235900 | -0.70138900 | 0.00001900  |
| C | -1.40232300 | 0.10264300  | 0.00000200  |
| C | -1.21942500 | 1.48989600  | -0.00002600 |
| C | 0.06514400  | 2.01997700  | -0.00004200 |
| C | 1.19997200  | 1.19980700  | -0.00002800 |
| H | -0.38512600 | -1.77564300 | 0.00004400  |
| H | -2.06532900 | 2.17153300  | -0.00003400 |
| C | 2.29086900  | -1.12655300 | 0.00002300  |
| C | 3.14246000  | -0.86745400 | 1.26725800  |
| H | 4.02091400  | -1.52497600 | 1.26915100  |
| H | 3.48875600  | 0.16684000  | 1.31522000  |
| H | 2.56193400  | -1.07905200 | 2.17315100  |
| C | 3.14252600  | -0.86739700 | -1.26715600 |
| H | 4.02098600  | -1.52491300 | -1.26902800 |
| H | 2.56205100  | -1.07896200 | -2.17308900 |
| H | 3.48881700  | 0.16690200  | -1.31505600 |

|   |             |             |             |
|---|-------------|-------------|-------------|
| C | 1.89730400  | -2.61700300 | -0.00001900 |
| H | 1.31678700  | -2.89058000 | 0.88858700  |
| H | 1.31685500  | -2.89054900 | -0.88867900 |
| H | 2.80619500  | -3.22919100 | 0.00000400  |
| C | -2.79808300 | -0.54927100 | 0.00001800  |
| C | -3.93079300 | 0.49509300  | 0.00000100  |
| H | -4.90225200 | -0.01197300 | 0.00001200  |
| H | -3.89466200 | 1.13616700  | 0.88859200  |
| H | -3.89466500 | 1.13613400  | -0.88861400 |
| C | -2.95999700 | -1.42974500 | 1.26188700  |
| H | -3.94862400 | -1.90554100 | 1.27354700  |
| H | -2.20749100 | -2.22390900 | 1.30290300  |
| H | -2.86034300 | -0.82917500 | 2.17330300  |
| C | -2.96000500 | -1.42979400 | -1.26181600 |
| H | -3.94863200 | -1.90559000 | -1.27345000 |
| H | -2.86035700 | -0.82926000 | -2.17325600 |
| H | -2.20750000 | -2.22396000 | -1.30280600 |
| O | 0.33583500  | 3.37623300  | -0.00006200 |
| H | -0.49657200 | 3.87113400  | -0.00023000 |
| O | 2.43488200  | 1.79873600  | -0.00005500 |
| H | 2.28135400  | 2.75971100  | -0.00011300 |

**Coordinates of Cu(II)-Cu(II) complex (MeOH coordinated Cu(II) dimer)**

82

-2453.674112 Hartrees

|    |             |             |             |
|----|-------------|-------------|-------------|
| Cu | 1.55208200  | -0.10328300 | -0.34857300 |
| O  | 2.61828600  | 0.84584500  | -1.75955900 |
| O  | 3.94151000  | 0.37493600  | -3.51939400 |
| O  | -0.10907800 | -1.25382700 | -0.01608100 |



|   |             |             |             |
|---|-------------|-------------|-------------|
| N | 2.94306600  | -0.35867300 | 1.43110900  |
| N | 2.66800900  | -1.79482900 | -0.93825800 |
| C | 3.27943800  | 0.52472800  | 2.37850500  |
| H | 2.69122200  | 1.43750400  | 2.40866300  |
| C | 4.71411700  | -1.79032300 | 2.17225500  |
| H | 5.26986900  | -2.71564600 | 2.05171900  |
| C | 5.05064800  | -0.87550600 | 3.16977400  |
| H | 5.87750800  | -1.07975700 | 3.84406900  |
| C | -0.19814700 | -2.58877000 | -0.10645500 |
| C | 3.64595700  | -1.49912400 | 1.32303400  |
| C | 3.17413300  | -2.48373100 | 0.26824600  |
| H | 3.98195300  | -3.18414900 | 0.00916500  |
| H | 2.35496900  | -3.07811500 | 0.68486700  |
| C | 3.77350300  | -1.25172900 | -1.76734600 |
| H | 4.11206000  | -1.99090000 | -2.50277800 |
| H | 4.61141400  | -1.00867300 | -1.10583200 |
| C | 3.41382400  | 0.07924200  | -2.45814600 |
| C | 1.73883200  | -2.62357600 | -1.77266600 |
| H | 1.32362300  | -1.93876200 | -2.52235600 |
| H | 2.32471500  | -3.38085200 | -2.31485300 |
| C | 0.66055500  | -3.31484400 | -0.97936200 |
| C | 0.53571900  | -4.70673100 | -1.05163100 |
| H | 1.20493000  | -5.25811200 | -1.70895000 |
| C | 4.31956800  | 0.30548300  | 3.27939500  |
| H | 4.55417600  | 1.04950100  | 4.03337700  |
| C | -1.24371400 | -4.68106400 | 0.56854900  |
| H | -1.97773100 | -5.20365100 | 1.17656300  |
| C | -1.12155300 | -3.30079200 | 0.69023100  |
| H | -1.74196400 | -2.73756600 | 1.37835200  |
| C | -0.42116400 | -5.39614500 | -0.30680300 |
| H | -0.50792600 | -6.47517600 | -0.39364200 |
| O | 4.94958800  | 1.66753400  | -0.28512100 |

|    |             |             |             |
|----|-------------|-------------|-------------|
| H  | 4.07239600  | 1.59878200  | -0.70655600 |
| C  | 5.76504800  | 2.46718700  | -1.12929000 |
| H  | 6.78270300  | 2.43421200  | -0.72702300 |
| H  | 5.44196300  | 3.52019800  | -1.14743900 |
| H  | 5.78122000  | 2.09075200  | -2.16123800 |
| Cu | -1.55208200 | 0.10328300  | 0.34857300  |
| O  | -2.61828700 | -0.84584500 | 1.75955900  |
| O  | -3.94151100 | -0.37493600 | 3.51939300  |
| O  | 0.10907800  | 1.25382700  | 0.01608200  |
| N  | -2.94306600 | 0.35867300  | -1.43110900 |
| N  | -2.66801000 | 1.79482900  | 0.93825800  |
| C  | -3.27943700 | -0.52472700 | -2.37850600 |
| H  | -2.69122100 | -1.43750400 | -2.40866300 |
| C  | -4.71411600 | 1.79032300  | -2.17225500 |
| H  | -5.26986800 | 2.71564600  | -2.05172000 |
| C  | -5.05064700 | 0.87550700  | -3.16977500 |
| H  | -5.87750700 | 1.07975800  | -3.84407000 |
| C  | 0.19814700  | 2.58877000  | 0.10645600  |
| C  | -3.64595600 | 1.49912400  | -1.32303500 |
| C  | -3.17413300 | 2.48373200  | -0.26824600 |
| H  | -3.98195300 | 3.18414900  | -0.00916500 |
| H  | -2.35496800 | 3.07811500  | -0.68486700 |
| C  | -3.77350300 | 1.25172900  | 1.76734600  |
| H  | -4.11206100 | 1.99090000  | 2.50277700  |
| H  | -4.61141400 | 1.00867400  | 1.10583100  |
| C  | -3.41382500 | -0.07924300 | 2.45814600  |
| C  | -1.73883200 | 2.62357600  | 1.77266600  |
| H  | -1.32362400 | 1.93876200  | 2.52235700  |
| H  | -2.32471600 | 3.38085200  | 2.31485300  |
| C  | -0.66055500 | 3.31484400  | 0.97936300  |
| C  | -0.53571900 | 4.70673000  | 1.05163200  |
| H  | -1.20493000 | 5.25811200  | 1.70895100  |

|   |             |             |             |
|---|-------------|-------------|-------------|
| C | -4.31956800 | -0.30548300 | -3.27939600 |
| H | -4.55417500 | -1.04950000 | -4.03337800 |
| C | 1.24371500  | 4.68106400  | -0.56854700 |
| H | 1.97773200  | 5.20365100  | -1.17656100 |
| C | 1.12155400  | 3.30079200  | -0.69023000 |
| H | 1.74196500  | 2.73756600  | -1.37835100 |
| C | 0.42116400  | 5.39614500  | 0.30680400  |
| H | 0.50792700  | 6.47517600  | 0.39364400  |
| O | -4.94958800 | -1.66753400 | 0.28512000  |
| H | -4.07239600 | -1.59878200 | 0.70655500  |
| C | -5.76504900 | -2.46718700 | 1.12928900  |
| H | -6.78270300 | -2.43421200 | 0.72702100  |
| H | -5.44196400 | -3.52019800 | 1.14743700  |
| H | -5.78122100 | -2.09075200 | 2.16123700  |

### **Coordinates of Cu(II)-Cu(II)-Substrate complex**

108

-2919.196903 Hartrees

|    |             |             |             |
|----|-------------|-------------|-------------|
| Cu | 2.06748500  | -0.73705200 | -0.72186400 |
| O  | 0.34407100  | -1.57017900 | -1.58922500 |
| O  | -0.27180500 | -3.51530700 | -2.56372400 |
| O  | 2.03760700  | -0.14030800 | 1.26298300  |

|    |            |             |             |
|----|------------|-------------|-------------|
| N  | 3.96608000 | -1.07446400 | -1.75213300 |
| N  | 2.41147600 | -2.74073000 | -0.21852600 |
| C  | 4.55113600 | -0.34493500 | -2.71346000 |
| H  | 4.01950700 | 0.55222900  | -3.01823200 |
| C  | 5.76218600 | -2.65152700 | -1.88056900 |
| H  | 6.20927900 | -3.57787800 | -1.53220200 |
| C  | 6.37523100 | -1.88765600 | -2.87272900 |
| H  | 7.31504800 | -2.21137900 | -3.31070700 |
| C  | 2.46716100 | -0.86492900 | 2.30312600  |
| C  | 4.55646100 | -2.20928200 | -1.33265500 |
| C  | 3.87127900 | -2.95069600 | -0.19858500 |
| H  | 4.12442200 | -4.02138500 | -0.23467100 |
| H  | 4.24898600 | -2.56378900 | 0.75483100  |
| C  | 1.75462900 | -3.50673600 | -1.30821600 |
| H  | 1.50860000 | -4.52339100 | -0.97598500 |
| H  | 2.46145500 | -3.59748300 | -2.13940900 |
| C  | 0.47705000 | -2.84020500 | -1.87926800 |
| C  | 1.74704000 | -3.00679700 | 1.09918200  |
| H  | 0.69783500 | -2.72442200 | 0.96484300  |
| H  | 1.77137700 | -4.08995500 | 1.29351700  |
| C  | 2.36412200 | -2.28560900 | 2.27212400  |
| C  | 2.85698000 | -3.02068200 | 3.35659400  |
| H  | 2.79164400 | -4.10647300 | 3.32529700  |
| C  | 5.76096300 | -0.71012300 | -3.29911700 |
| H  | 6.20147700 | -0.08872600 | -4.07175900 |
| C  | 3.50428500 | -1.00101500 | 4.49822100  |
| H  | 3.93848800 | -0.49824000 | 5.35858300  |
| C  | 3.06011700 | -0.24027200 | 3.42188600  |
| H  | 3.12360200 | 0.84304600  | 3.42829500  |
| C  | 3.41170300 | -2.39612100 | 4.47402400  |
| H  | 3.77133400 | -2.99024300 | 5.30895500  |
| Cu | 1.30575500 | 1.70444400  | 1.13433000  |

|   |             |             |             |
|---|-------------|-------------|-------------|
| O | 2.27724900  | 2.65283600  | 2.56338100  |
| O | 2.50513900  | 4.69111600  | 3.47937200  |
| O | 1.53602100  | 1.17433400  | -0.83210300 |
| N | -0.88951500 | 1.59271500  | 1.66229500  |
| N | 0.66334100  | 3.58931700  | 0.55627100  |
| C | -1.54352900 | 0.75969600  | 2.48034400  |
| H | -0.96644600 | -0.06975700 | 2.87741100  |
| C | -2.89022700 | 2.88522500  | 1.40966600  |
| H | -3.39157100 | 3.74008500  | 0.96577400  |
| C | -3.57111600 | 2.01425300  | 2.25999000  |
| H | -4.61968300 | 2.17976700  | 2.48918400  |
| C | 1.38288200  | 1.91798800  | -1.93085100 |
| C | -1.54767900 | 2.63540400  | 1.12727900  |
| C | -0.75909200 | 3.48576800  | 0.15211400  |
| H | -1.20602900 | 4.48601500  | 0.05502200  |
| H | -0.80110200 | 3.00625900  | -0.83087200 |
| C | 0.84974700  | 4.42268300  | 1.77365300  |
| H | 1.02049000  | 5.47109800  | 1.50339000  |
| H | -0.06982600 | 4.37580400  | 2.36491600  |
| C | 1.99330300  | 3.91419300  | 2.68698100  |
| C | 1.57460000  | 4.05137700  | -0.53790700 |
| H | 2.59106100  | 3.93105900  | -0.14284800 |
| H | 1.41439400  | 5.12844600  | -0.69539800 |
| C | 1.39804200  | 3.33710500  | -1.85442500 |
| C | 1.23735000  | 4.07997100  | -3.02868300 |
| H | 1.23378800  | 5.16608400  | -2.96382100 |
| C | -2.88795300 | 0.92989600  | 2.80651700  |
| H | -3.38047500 | 0.22472100  | 3.46647900  |
| C | 1.06389000  | 2.07037000  | -4.34195900 |
| H | 0.92031200  | 1.57320100  | -5.29783100 |
| C | 1.18439800  | 1.30380900  | -3.18685200 |
| H | 1.10841000  | 0.22149400  | -3.22365700 |

|   |             |             |             |
|---|-------------|-------------|-------------|
| C | 1.09209900  | 3.46571500  | -4.27302800 |
| H | 0.98105000  | 4.06740300  | -5.16997200 |
| C | -4.13822800 | -1.93003200 | 0.24072900  |
| C | -5.31882900 | -1.29430200 | -0.16644600 |
| C | -5.34716100 | -0.17814400 | -1.01832400 |
| C | -4.12371500 | 0.29738500  | -1.49229200 |
| C | -2.92025400 | -0.29563900 | -1.10840100 |
| C | -2.91733000 | -1.38841900 | -0.22015100 |
| H | -6.26264200 | -1.69209700 | 0.18442900  |
| H | -4.05509500 | 1.13522300  | -2.17655100 |
| C | -4.16907700 | -3.19549200 | 1.12730100  |
| C | -3.43053100 | -2.95003100 | 2.46549900  |
| H | -3.44317800 | -3.86240100 | 3.07569400  |
| H | -2.39144600 | -2.65813400 | 2.30448600  |
| H | -3.92992000 | -2.16011200 | 3.04088000  |
| C | -3.50539400 | -4.37197100 | 0.36817200  |
| H | -3.50452000 | -5.27291700 | 0.99576800  |
| H | -4.06248200 | -4.59978400 | -0.54793500 |
| H | -2.47607700 | -4.14165800 | 0.08807100  |
| C | -5.60781300 | -3.62908400 | 1.47655600  |
| H | -6.14422300 | -2.86267500 | 2.04862100  |
| H | -6.19528400 | -3.86407500 | 0.58191700  |
| H | -5.57152500 | -4.53440700 | 2.09371600  |
| C | -6.69521400 | 0.45471600  | -1.41174800 |
| C | -6.52085700 | 1.66130500  | -2.35380700 |
| H | -7.50149300 | 2.08382200  | -2.60264400 |
| H | -5.92475400 | 2.45617500  | -1.89042500 |
| H | -6.03447200 | 1.37595600  | -3.29331000 |
| C | -7.43021500 | 0.94327600  | -0.14069700 |
| H | -8.39806900 | 1.39096500  | -0.40069500 |
| H | -7.61890200 | 0.12309500  | 0.55993300  |
| H | -6.83643900 | 1.70114000  | 0.38490700  |

|   |             |             |             |
|---|-------------|-------------|-------------|
| C | -7.57404400 | -0.59302700 | -2.13582300 |
| H | -8.54027800 | -0.15629100 | -2.41964200 |
| H | -7.08084500 | -0.95131800 | -3.04651700 |
| H | -7.77443900 | -1.46322800 | -1.50210500 |
| O | -1.75943500 | 0.26705000  | -1.58161000 |
| H | -1.06674600 | -0.40973800 | -1.75696100 |
| O | -1.72976400 | -1.91703100 | 0.22359100  |
| H | -0.99128700 | -1.62790500 | -0.35274800 |

### **Coordinates of Cu(I)-Cu(I)-Product complex (Phenoxide acceptor)**

108

-2919.228355 Hartrees

|    |            |             |             |
|----|------------|-------------|-------------|
| Cu | 2.51032000 | 0.94089600  | -0.38387300 |
| O  | 0.91153400 | -0.03762800 | -1.91966900 |
| O  | 0.47661200 | -1.78375300 | -3.29314600 |
| O  | 2.11977000 | -0.56436800 | 1.34364300  |
| N  | 4.51726200 | 1.35268300  | -0.42373500 |
| N  | 3.48825500 | -1.05072000 | -1.55144700 |
| C  | 4.95055100 | 2.42013700  | 0.27649300  |
| H  | 4.18847200 | 3.16455700  | 0.49365900  |
| C  | 6.74065300 | 0.46851000  | -0.41268000 |
| H  | 7.42187100 | -0.32600600 | -0.70430400 |
| C  | 7.18832700 | 1.56060700  | 0.32781600  |
| H  | 8.23006300 | 1.62954100  | 0.62945500  |
| C  | 3.22171900 | -1.33030800 | 1.64314800  |
| C  | 5.39592300 | 0.40039600  | -0.78341800 |
| C  | 4.90135700 | -0.69237900 | -1.72137200 |
| H  | 5.03738300 | -0.31009400 | -2.74099400 |



|    |             |             |             |
|----|-------------|-------------|-------------|
| H  | 5.55997200  | -1.57016100 | -1.63462200 |
| C  | 2.77170600  | -1.19712200 | -2.82538700 |
| H  | 2.97392800  | -2.15792100 | -3.32409300 |
| H  | 3.09448400  | -0.39330100 | -3.49685400 |
| C  | 1.25094800  | -1.06295400 | -2.69706200 |
| C  | 3.29826100  | -2.26700300 | -0.72369800 |
| H  | 2.22472100  | -2.46731600 | -0.68950000 |
| H  | 3.77279500  | -3.13201300 | -1.22129900 |
| C  | 3.84187900  | -2.15426500 | 0.68207700  |
| C  | 4.97684100  | -2.87958100 | 1.06745900  |
| H  | 5.44764900  | -3.53729100 | 0.33934300  |
| C  | 6.27895500  | 2.56211100  | 0.66900900  |
| H  | 6.58598700  | 3.43809900  | 1.23155800  |
| C  | 4.90687700  | -1.92671400 | 3.27913000  |
| H  | 5.31451500  | -1.83068400 | 4.28215700  |
| C  | 3.76353700  | -1.21056100 | 2.92599900  |
| H  | 3.26367000  | -0.55561100 | 3.63301800  |
| C  | 5.51361300  | -2.77487900 | 2.35113400  |
| H  | 6.39587300  | -3.34812200 | 2.62192400  |
| Cu | -1.09814600 | 1.49215400  | 0.36091200  |
| O  | 0.93825400  | 2.16078100  | 0.08081500  |
| O  | 2.16734100  | 4.05126600  | -0.07001700 |
| O  | -1.53655100 | 0.42190100  | -1.31189000 |
| N  | -2.26012200 | 2.57024800  | 1.84694900  |
| N  | -1.37646500 | 3.46390400  | -0.58176400 |
| C  | -2.38702000 | 2.22809300  | 3.13577200  |
| H  | -1.91935300 | 1.28718800  | 3.41314900  |
| C  | -3.49529600 | 4.57308500  | 2.26914400  |
| H  | -3.91387500 | 5.50152800  | 1.89150200  |
| C  | -3.63576300 | 4.21495200  | 3.60967600  |
| H  | -4.17096900 | 4.86439800  | 4.29686000  |
| C  | -2.42677400 | 0.91855500  | -2.17339400 |

|   |             |             |             |
|---|-------------|-------------|-------------|
| C | -2.80025300 | 3.72135700  | 1.40757600  |
| C | -2.63615100 | 4.01522500  | -0.07403600 |
| H | -2.72378600 | 5.09987300  | -0.25411000 |
| H | -3.45312900 | 3.53117800  | -0.62310600 |
| C | -0.20672300 | 4.25557000  | -0.15587000 |
| H | -0.03528500 | 5.11224800  | -0.82362600 |
| H | -0.40480600 | 4.65999600  | 0.84322700  |
| C | 1.09955000  | 3.43666100  | -0.05337800 |
| C | -1.36686800 | 3.23382800  | -2.05383500 |
| H | -0.37377600 | 2.82777200  | -2.27482200 |
| H | -1.45262800 | 4.20008000  | -2.57891000 |
| C | -2.43691500 | 2.29199000  | -2.55173700 |
| C | -3.41782500 | 2.75152000  | -3.44074800 |
| H | -3.41150200 | 3.80294600  | -3.72547000 |
| C | -3.07056600 | 3.01997700  | 4.05623100  |
| H | -3.14911700 | 2.70902900  | 5.09304300  |
| C | -4.35961900 | 0.54737700  | -3.62305500 |
| H | -5.09298500 | -0.13765000 | -4.04333700 |
| C | -3.40326700 | 0.06600600  | -2.73404700 |
| H | -3.36887500 | -0.98393000 | -2.45812300 |
| C | -4.38082600 | 1.89922300  | -3.98047700 |
| H | -5.12612700 | 2.27985200  | -4.67302000 |
| C | -1.79373300 | -3.62280000 | 0.29415900  |
| C | -3.14576900 | -3.52365100 | 0.46196800  |
| C | -3.86306300 | -2.34432200 | 0.92628700  |
| C | -3.14469100 | -1.23300400 | 1.25216800  |
| C | -1.71170400 | -1.20773800 | 1.12751500  |
| C | -0.98815700 | -2.42753500 | 0.60437600  |
| H | -3.75267200 | -4.39100800 | 0.23358000  |
| H | -3.61035100 | -0.31951500 | 1.60220700  |
| C | -1.11089000 | -4.91161900 | -0.19359200 |
| C | -0.07686800 | -5.38898100 | 0.85765200  |

|   |             |             |             |
|---|-------------|-------------|-------------|
| H | 0.40128300  | -6.31379900 | 0.51210900  |
| H | 0.69969800  | -4.64107800 | 1.02495800  |
| H | -0.56516100 | -5.60269900 | 1.81652300  |
| C | -0.40806300 | -4.65356100 | -1.54829100 |
| H | 0.08733300  | -5.57169800 | -1.88864700 |
| H | -1.13002400 | -4.35319300 | -2.31534100 |
| H | 0.33942600  | -3.86403400 | -1.47692900 |
| C | -2.12329400 | -6.05548400 | -0.40265900 |
| H | -2.65241700 | -6.31488400 | 0.52246100  |
| H | -2.86667600 | -5.81379100 | -1.17145800 |
| H | -1.58865100 | -6.95123000 | -0.73741800 |
| C | -5.39297600 | -2.41437700 | 1.01057800  |
| C | -6.00691900 | -1.09853100 | 1.52365000  |
| H | -7.09763900 | -1.19377000 | 1.56771100  |
| H | -5.65476600 | -0.85167500 | 2.53189100  |
| H | -5.77356000 | -0.25778500 | 0.86100000  |
| C | -5.81131800 | -3.55186900 | 1.97459400  |
| H | -6.90485300 | -3.61310000 | 2.03008400  |
| H | -5.44302900 | -4.53024100 | 1.64884400  |
| H | -5.42961700 | -3.36902000 | 2.98568200  |
| C | -5.96468300 | -2.69404400 | -0.40202100 |
| H | -7.05935500 | -2.74822000 | -0.36015800 |
| H | -5.68765900 | -1.89457500 | -1.09815700 |
| H | -5.60225400 | -3.64134700 | -0.81503200 |
| O | -1.03024300 | -0.20153900 | 1.46575500  |
| O | 0.25112600  | -2.39094900 | 0.49498700  |
| H | -0.10545200 | 0.06647800  | -1.79225700 |
| H | 1.35473800  | -1.11633000 | 1.03055000  |

**Coordinates of Cu(I)-Cu(I) complex (After product elimination)**

-2223.550621

|    |            |             |             |
|----|------------|-------------|-------------|
| Cu | 2.23777000 | -0.49830500 | -0.31522300 |
| O  | 1.15983100 | -1.53667300 | 1.10099100  |
| O  | 0.97619200 | -1.76288900 | 3.33469700  |
| O  | 1.21146000 | 1.33568900  | -0.34567800 |
| N  | 4.08117400 | -1.10179200 | -0.92037200 |
| N  | 3.37992700 | 0.17389900  | 1.51031900  |
| C  | 4.34513800 | -1.93535900 | -1.94356000 |
| H  | 3.52532800 | -2.11378900 | -2.63234500 |
| C  | 6.32475900 | -1.41951000 | -0.14145300 |
| H  | 7.08634600 | -1.19378400 | 0.59935800  |
| C  | 6.59348200 | -2.28319100 | -1.20199500 |
| H  | 7.57133600 | -2.74555600 | -1.30158000 |
| C  | 1.96959600 | 2.46275000  | -0.22073900 |
| C  | 5.06240500 | -0.83424000 | -0.02771500 |
| C  | 4.77089800 | 0.18622500  | 1.06840200  |
| H  | 5.48617800 | 0.04150400  | 1.89612100  |
| H  | 4.97180900 | 1.17945400  | 0.64708100  |
| C  | 3.04699800 | -0.90117500 | 2.46166800  |
| H  | 3.21018000 | -0.59547100 | 3.50507100  |
| H  | 3.70981300 | -1.75142900 | 2.25854700  |
| C  | 1.59119500 | -1.43241400 | 2.32679000  |
| C  | 2.86626700 | 1.49042100  | 1.95490400  |
| H  | 1.84154300 | 1.30788400  | 2.29733100  |
| H  | 3.43787800 | 1.85754600  | 2.82515100  |
| C  | 2.84777600 | 2.55871200  | 0.88107300  |
| C  | 3.64054000 | 3.70769000  | 0.99143600  |
| H  | 4.31280300 | 3.79891900  | 1.84273000  |
| C  | 5.58299000 | -2.54412600 | -2.12646100 |
| H  | 5.74118400 | -3.20870100 | -2.96955100 |
| C  | 2.68140100 | 4.62836000  | -1.02012300 |

|    |             |             |             |
|----|-------------|-------------|-------------|
| H  | 2.61152500  | 5.42594000  | -1.75530500 |
| C  | 1.88478800  | 3.49246200  | -1.16485100 |
| H  | 1.19676200  | 3.38027900  | -1.99883700 |
| C  | 3.56760100  | 4.73975200  | 0.05361600  |
| H  | 4.19035800  | 5.62278500  | 0.16495700  |
| Cu | -2.23776900 | 0.49830900  | 0.31522000  |
| O  | -1.15983100 | 1.53667300  | -1.10099500 |
| O  | -0.97619600 | 1.76289300  | -3.33470100 |
| O  | -1.21146000 | -1.33568700 | 0.34567900  |
| N  | -4.08117300 | 1.10179000  | 0.92037400  |
| N  | -3.37992800 | -0.17389800 | -1.51032000 |
| C  | -4.34513700 | 1.93535300  | 1.94356500  |
| H  | -3.52532700 | 2.11378400  | 2.63234900  |
| C  | -6.32476000 | 1.41950400  | 0.14146000  |
| H  | -7.08634800 | 1.19377800  | -0.59935000 |
| C  | -6.59348400 | 2.28318200  | 1.20200500  |
| H  | -7.57133900 | 2.74554300  | 1.30159200  |
| C  | -1.96959600 | -2.46274900 | 0.22073900  |
| C  | -5.06240600 | 0.83423800  | 0.02771900  |
| C  | -4.77089800 | -0.18622500 | -1.06840200 |
| H  | -5.48617900 | -0.04150200 | -1.89611900 |
| H  | -4.97180800 | -1.17945500 | -0.64708300 |
| C  | -3.04700000 | 0.90117700  | -2.46166900 |
| H  | -3.21018400 | 0.59547300  | -3.50507200 |
| H  | -3.70981500 | 1.75143100  | -2.25854700 |
| C  | -1.59119700 | 1.43241600  | -2.32679400 |
| C  | -2.86626600 | -1.49041800 | -1.95490500 |
| H  | -1.84154200 | -1.30788100 | -2.29733100 |
| H  | -3.43787600 | -1.85754400 | -2.82515200 |
| C  | -2.84777500 | -2.55871000 | -0.88107400 |
| C  | -3.64053800 | -3.70768900 | -0.99143900 |
| H  | -4.31280000 | -3.79891700 | -1.84273300 |

|   |             |             |             |
|---|-------------|-------------|-------------|
| C | -5.58299100 | 2.54411600  | 2.12647000  |
| H | -5.74118500 | 3.20868900  | 2.96956200  |
| C | -2.68140000 | -4.62836000 | 1.02012000  |
| H | -2.61152300 | -5.42594000 | 1.75530200  |
| C | -1.88478800 | -3.49246100 | 1.16484900  |
| H | -1.19676200 | -3.38027900 | 1.99883600  |
| C | -3.56759900 | -4.73975100 | -0.05361900 |
| H | -4.19035600 | -5.62278500 | -0.16496200 |
| H | -0.29146100 | -1.49625500 | 0.79963200  |
| H | 0.29146200  | 1.49625700  | -0.79963300 |

### Coordinates of Product (*Ortho*-Quinone)

36

-695.688421 Hartrees

|   |             |             |             |
|---|-------------|-------------|-------------|
| C | 1.10102200  | -0.12967100 | 0.00001200  |
| C | -0.16393100 | -0.61936200 | 0.00005300  |
| C | -1.40717900 | 0.17388400  | 0.00000400  |
| C | -1.33828500 | 1.52640600  | -0.00005600 |
| C | -0.04996200 | 2.21794300  | -0.00005800 |
| C | 1.24929300  | 1.35364300  | -0.00012500 |
| H | -0.29609600 | -1.69443300 | 0.00012700  |
| H | -2.21439000 | 2.16430300  | -0.00009200 |
| C | 2.35478700  | -1.01531400 | 0.00005300  |
| C | 3.19857100  | -0.72197100 | 1.26647400  |
| H | 4.08943800  | -1.36133600 | 1.27169000  |
| H | 3.52290100  | 0.31955500  | 1.29727700  |

|   |             |             |             |
|---|-------------|-------------|-------------|
| H | 2.62594600  | -0.93725600 | 2.17662800  |
| C | 3.19872800  | -0.72183300 | -1.26623100 |
| H | 4.08962000  | -1.36116400 | -1.27138500 |
| H | 2.62623100  | -0.93705600 | -2.17648000 |
| H | 3.52302400  | 0.31970900  | -1.29689800 |
| C | 1.99933500  | -2.51415800 | -0.00004600 |
| H | 1.42638800  | -2.80263700 | 0.88933500  |
| H | 1.42658000  | -2.80256800 | -0.88957400 |
| H | 2.92219900  | -3.10399400 | 0.00002900  |
| C | -2.73160800 | -0.60000300 | 0.00004100  |
| C | -3.95251800 | 0.33775400  | 0.00003400  |
| H | -4.87214400 | -0.25730100 | 0.00005500  |
| H | -3.97289800 | 0.97925000  | 0.88775800  |
| H | -3.97291400 | 0.97921600  | -0.88771300 |
| C | -2.80432200 | -1.49025500 | 1.26590100  |
| H | -3.74590800 | -2.05144600 | 1.27082600  |
| H | -1.98772200 | -2.21792800 | 1.31466500  |
| H | -2.76773000 | -0.88110100 | 2.17586800  |
| C | -2.80435900 | -1.49031800 | -1.26577200 |
| H | -3.74595100 | -2.05150000 | -1.27064600 |
| H | -2.76778200 | -0.88121100 | -2.17577100 |
| H | -1.98776800 | -2.21800200 | -1.31451800 |
| O | 0.05131600  | 3.43410300  | -0.00020900 |
| O | 2.32137700  | 1.93545100  | -0.00015200 |
